# Supplementary material
Source: PubMed Central journal article supplement (PMC6413963)
Supplement: zh8999129993000-suppl1.pdf [file zh8999129993000-suppl1.pdf]

# Supplementary Figure 1

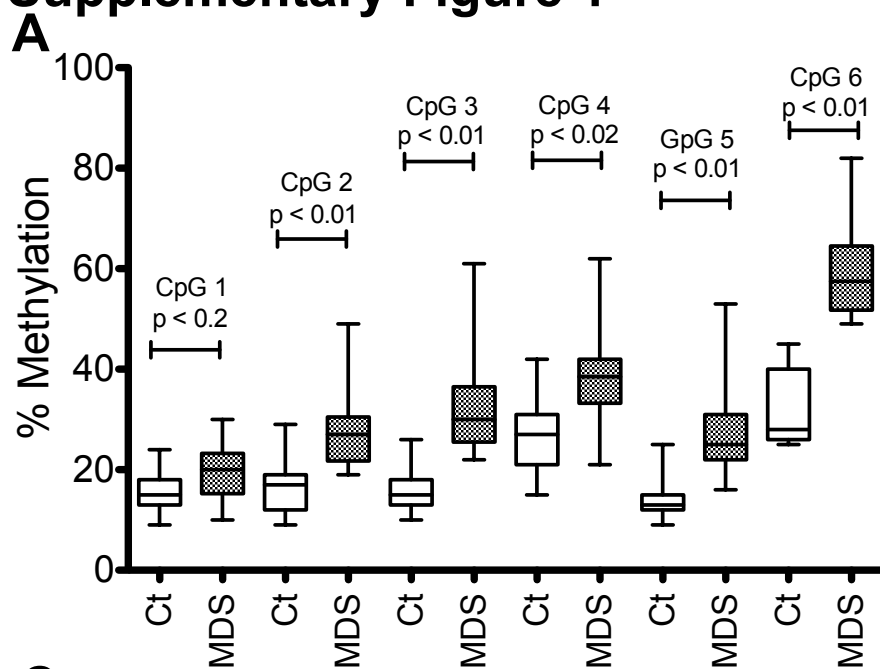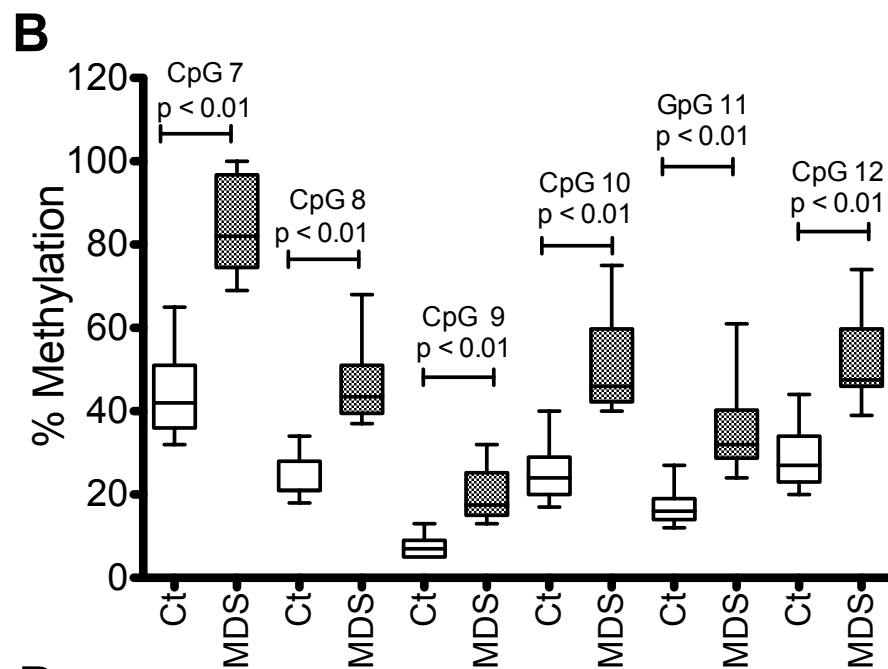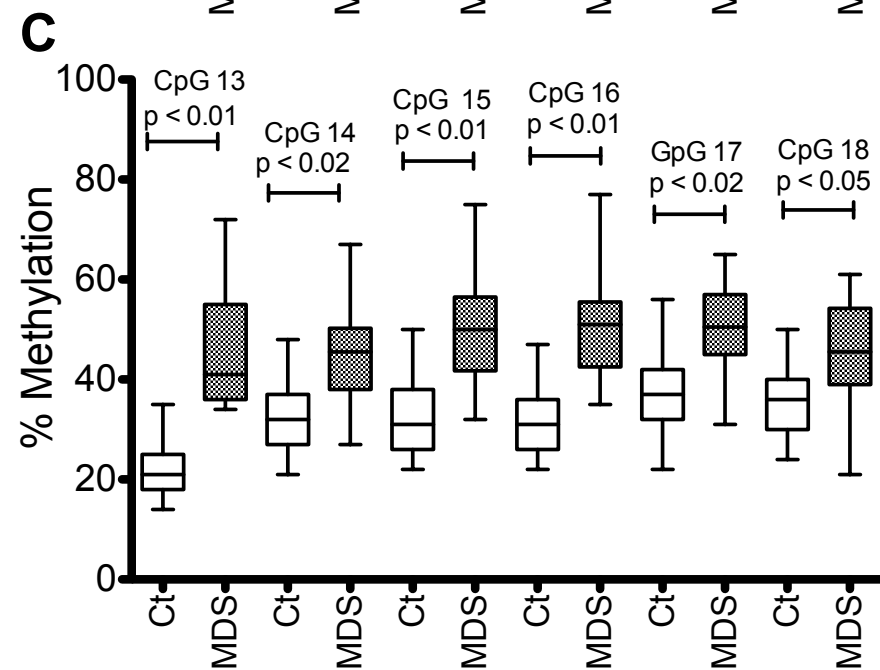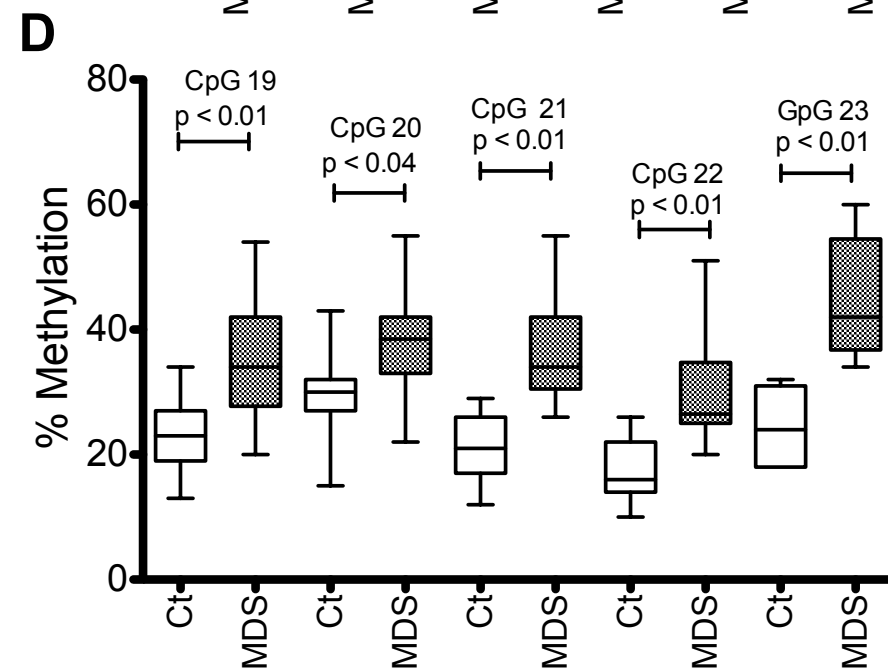

**Supplementary Figure 1: Hypermethylation of the rDNA promoter in MDS CD34+ cells.**

The percent DNA methylation across the 23 CpGs of the rDNA promoter (A. CpGs 1-6, B. CpGs 7-12, C. CpGs 13-18 and D. CpGs 19-23) from 11 control and 14 MDS samples as determined by pyrosequencing. Of the 23 CpGs, 22 demonstrated significantly higher (p value < 0.05) methylation compared to that in control samples. The ends of the whiskers represent minimum and maximum values while the bar indicates the median value (50th percentile). Significance was determined using the Mann-Whitney test.
